# Supplementary material for: Antimyeloma Effects of the Heat Shock Protein 70 Molecular Chaperone Inhibitor MAL3-101
Source: Hindawi journal article supplement (doi:10.1155/2011/232037), 2011-01-01

## Supplementary Fig. S2

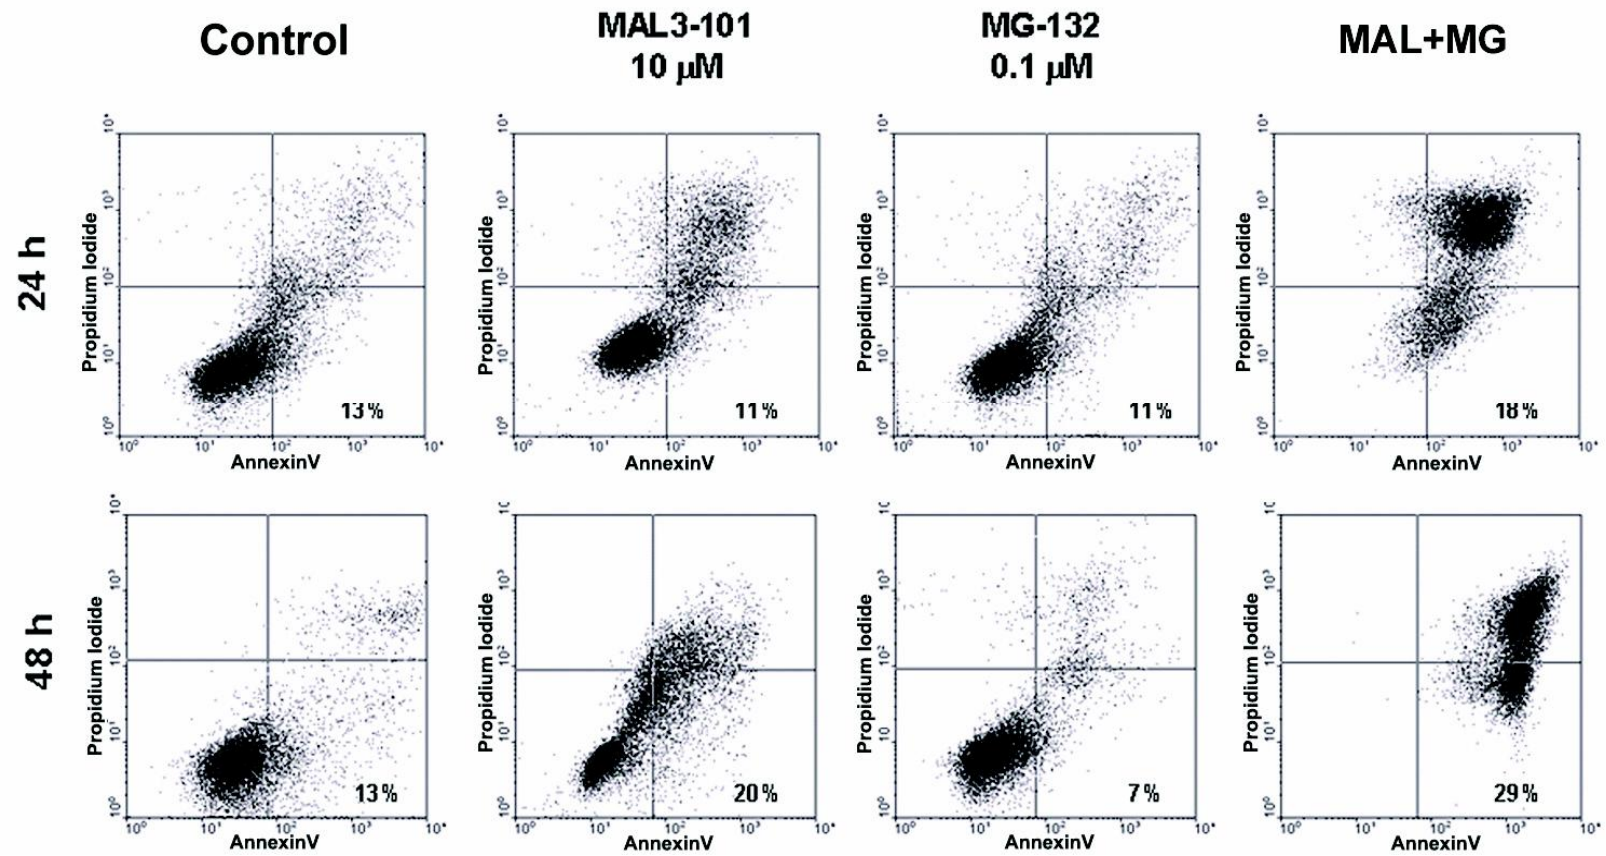

Supplement: f2 [file 232037.f2.pdf]
