# Supplementary material for: Antimyeloma Effects of the Heat Shock Protein 70 Molecular Chaperone Inhibitor MAL3-101
Source: Hindawi journal article supplement (doi:10.1155/2011/232037), 2011-01-01
Supplement: f4 [file 232037.f4.pdf]

## Supplementary Table

| Treatment of NCI-H929       | IC <sub>50</sub> (μ M) at 40 h |
|-----------------------------|--------------------------------|
| <b><u>Single agents</u></b> |                                |
| MAL3-101                    | 8.3                            |
| MG-132                      | 1.7                            |
| 17-AAG                      | 0.40                           |
| <b><u>Combinations</u></b>  |                                |
| MAL3-101 + MG-132           | 0.008                          |
| MAL3-101 + 17-AAG           | 0.03                           |
